# Supplementary material for: Rapid Assembly of Customized TALENs into Multiple Delivery Systems
Source: PubMed Central journal article supplement (PMC3820630; doi:10.1371/journal.pone.0080281), 2013-11-07
Supplement: pone.0080281.s001.pdf [file pone.0080281.s001.pdf]

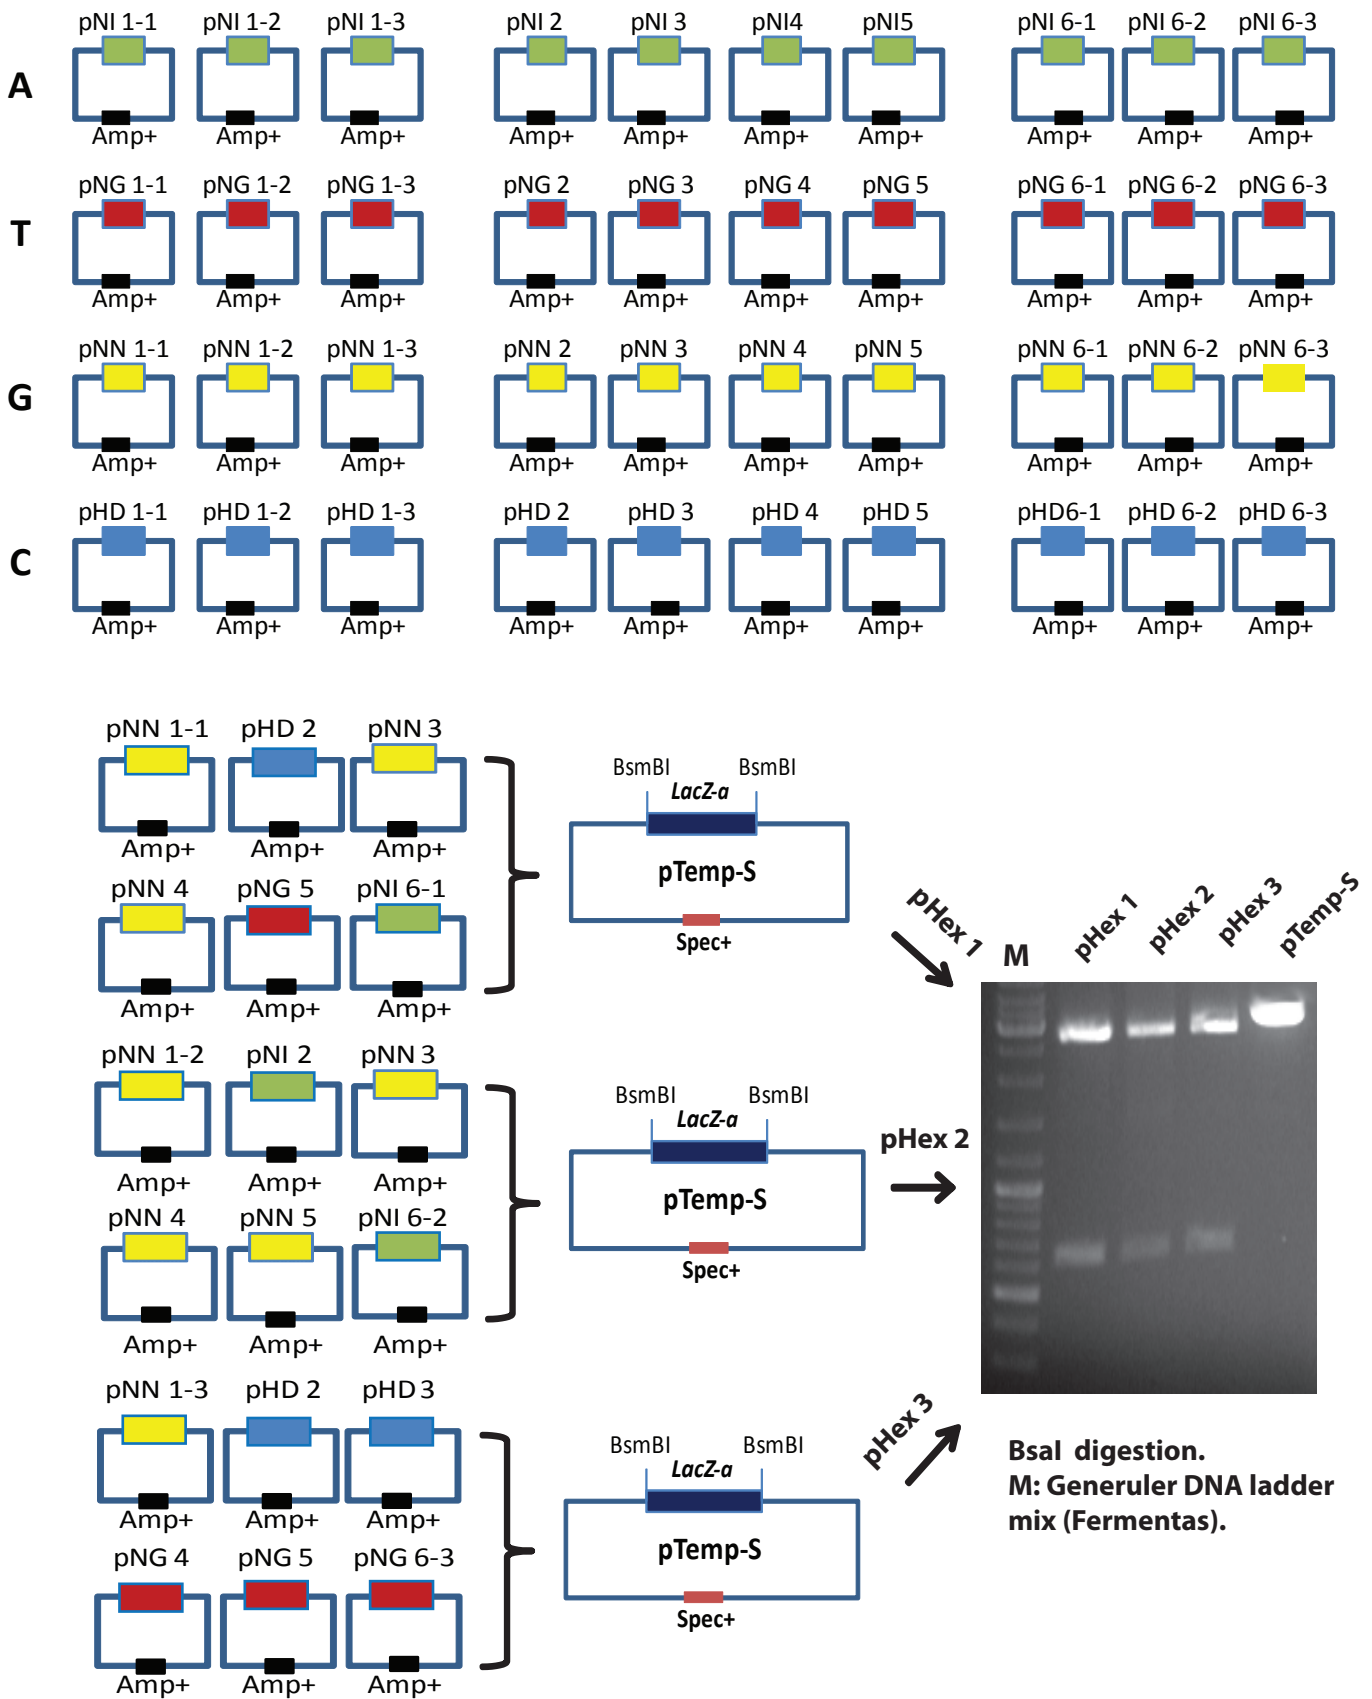

**Figure S1. Repeat variable di-residue (RVD) plasmid library and hexamer assembly.**

Upper: RVD library plasmids for TALEN assembly. Lower: example of assembly of 3 hexamers for the left TALEN of exon 1 of Ddx3x.
