# Supplementary material for: Rapid Assembly of Customized TALENs into Multiple Delivery Systems
Source: PubMed Central journal article supplement (PMC3820630; doi:10.1371/journal.pone.0080281), 2013-11-07
Supplement: pone.0080281.s003.pdf [file pone.0080281.s003.pdf]

## **Protocol S1.**

### **A. Assembly of TAL effector RVDs into TALEN expression Entry vectors.**

#### *Step 1. Assembly of Hexamers.*

1. Pick six TAL RVD plasmids, 200-250 ng for each, 200 ng pTemp-S.
2. Add 2  $\mu$ l 10x T4 DNA ligase buffer, 1  $\mu$ l BsmBI (New England Biolabs, R0580), and make up to 20  $\mu$ l with ddH<sub>2</sub>O.
3. Incubation 60 minutes at 55°C.
4. Add 1  $\mu$ l T4 DNA ligase (New England Biolabs, M0202). Then run cycle as: 37° C 5min, 16 °C 10 min, total 9 cycles, followed by 16 °C 20 min .
5. Add Plasmid-Safe nuclease (Epicentre, E3101K) 1  $\mu$ l into each reaction, then incubate 30-60 min at 37° C. Take out 6  $\mu$ l of each ligation product and save at -20 °C. The rest of three hexamer ligation products for each side TALEN are combined into ONE tube.
6. Add 8  $\mu$ l QIAEX II Suspension into each tube and purify through QIAEX II Gel Extraction Kit (Qiagen) following the manual.
7. Elute DNAs in 13  $\mu$ l EB buffer (~11.5  $\mu$ l may be recovered).

#### *Step 2. Assembly of TALEN.*

1. Add 100 ng (1  $\mu$ l) TALEN expression Entry vectors which contains the last 0.5 appropriate RVD into the tube containing purified hexamer mixture, 1.5 10x T4 DNA ligase buffer, 1  $\mu$ l Bsal, 1  $\mu$ l T4 DNA ligase (New England Biolabs, #M202S), total volume 15  $\mu$ l.
2. Run the second golden gate ligation at 37° C 5min, 16° C 10 min, total 9 cycles, followed by 37 °C 15 min, 80 °C 10 min.
3. Transform 7  $\mu$ l ligation product into 50  $\mu$ l chemically competent DH 5 $\alpha$  cells or other chemically competent cells.
4. Plate the cells on a Kan+ LB-agar plate.
5. Pick up the colonies to grow plasmids.
6. Digest the plasmid by using Sall.

**B. Example of restriction enzymes digestion patterns of different TALEN vectors.**

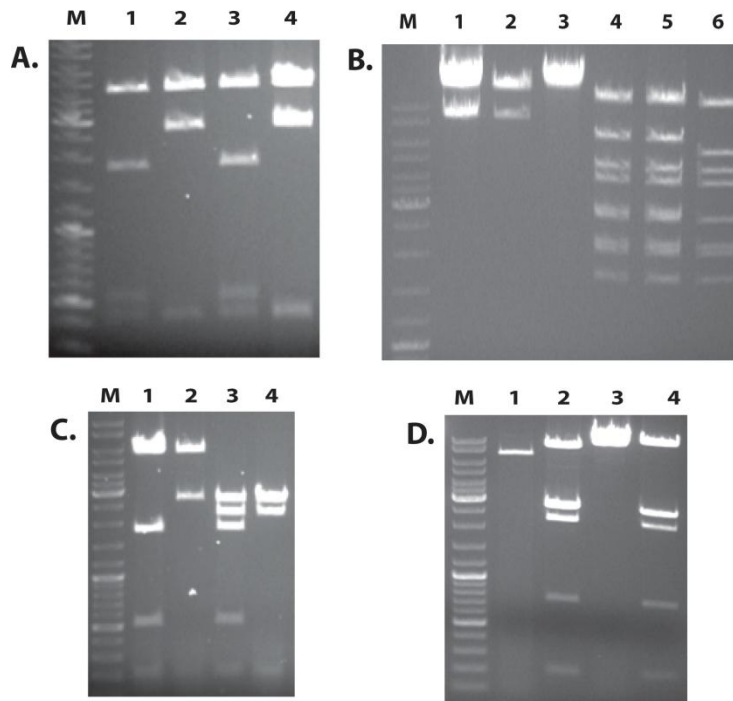

**A. Entry plasmids.** Lanes 1 and 3, pENTR-EF1a-TALEN-NN-T2A-EGFP and pENTR-EF1a-TALEN-NN-T2A-mCherry. Lanes 2 and 4, pENTR-EF1a-Ddx3x-TALEN (L)-T2A-EGFP and pENTR-EF1a-Ddx3x-TALEN (R)-T2A-mCherry. Restriction enzyme: Sal I.

**B. Adenoviral plasmids.** Lanes 1, 2, 4 and 5, pAd-EF1a-Ddx3x-TALEN (L)-T2A-EGFP and pAd-EF1a-Ddx3x (R)-TALEN-T2A-mCherry. Lanes 3 and 6, pAd/PL-DEST. Restriction enzymes: SnaB I for Lanes 1 to 3. PvuI for Lanes 4 to 6.

**C. Entry plasmids for “2 in 1” system.** Lanes 1 and 3, pL1R5-CAG-EGFP-T2A-TALEN-NN-BGHpA and pL5L2-EF1a-mCherry-T2A-TALEN-NN. Lanes 2 and 4, pL1R5-CAG-EGFP-Ddx3x-TALEN (L)-BGHpA and pL5L2-EF1a-mCherry-T2A-Ddx3x-TALEN (R). Restriction enzyme: Sall.

**D. TALEN “2 in 1” plasmids.** Lanes 1 and 3, Destination plasmids pPB-DEST and pPB-Puro-DEST. Lanes 2 and 4, pPB-Ddx3x-TALEN and pPB-Ddx3x-TALEN-Puro. Restriction enzyme: Sal I.

M: Generuler DNA ladder mix (Fermentas).
