# Supplementary material for: Rapid Assembly of Customized TALENs into Multiple Delivery Systems
Source: PubMed Central journal article supplement (PMC3820630; doi:10.1371/journal.pone.0080281), 2013-11-07
Supplement: pone.0080281.s004.pdf [file pone.0080281.s004.pdf]

**Supplementary Table S1. Comparison of the Strategy of TALEN Assembly**

|                            | Plasmid number for RVD assembly ( Includes RVD plasmids and intermediate plasmids, but not the TALEN backbones ) | RVD assembly                                                                                                  |                        | TALEN expression vector                                                       | RVD number in TALEN (one side) | Transformation |
|----------------------------|------------------------------------------------------------------------------------------------------------------|---------------------------------------------------------------------------------------------------------------|------------------------|-------------------------------------------------------------------------------|--------------------------------|----------------|
|                            |                                                                                                                  | PCR Amplification and Purification                                                                            | Plasmid module cloning |                                                                               |                                |                |
| Sanjana NE, et al [15].    | 4                                                                                                                | Yes. Golden-gate ligation to form three hexamers , then amplified hexamers.                                   |                        | Golden-gate ligation.<br><br>CMV promoter for mammalian cells.                | 19.5                           | one            |
| Uhde-Stone C, et al [54] . | 4                                                                                                                | Yes. Golden-gate ligation to form two hexamersn and one quatromer, then amplified hexamers and quatromer      |                        | Golden-gate ligation.<br><br>CMV, EF1a and MSCV promoter for mammalian cells. | 17.5                           | one            |
| Miller J, et al [20] .     | Not clear                                                                                                        | Yes. Amplified individual module, then formed TALE through overlap PCR.                                       |                        | Ligation.<br><br>CMV promoter for mammalian cells.                            | 12.5                           | one            |
| Li T, et al [24].          | 4                                                                                                                | Yes. Golden-gate ligation to form octomers. Then the octomers were digested by different restriction enzymes. |                        | Ligation                                                                      | 15.5 or 23.5                   | one            |

|                            |     |                                                                                                                                                        |                                                                                |                                                                                                                                                                                      |           |     |
|----------------------------|-----|--------------------------------------------------------------------------------------------------------------------------------------------------------|--------------------------------------------------------------------------------|--------------------------------------------------------------------------------------------------------------------------------------------------------------------------------------|-----------|-----|
| Zhang Z, et al [55].       | 256 | Amplified two tetramers                                                                                                                                |                                                                                | Ligation<br>EF1a promoter for mammalian cells.                                                                                                                                       | 21.5      | one |
| This work                  | 41  | No                                                                                                                                                     | Golden-gate ligation                                                           | Golden-gate ligation.<br>EF1a and CAG promoter for mammalian cells.<br>With reporter genes in vectors.<br>Can be transferred to other delivery system through Gateway recombination. | 19.5      | one |
| Weber E, et al [56].       | 71  | No                                                                                                                                                     | Golden-gate ligation                                                           | Golden-gate ligation                                                                                                                                                                 | 17.5      | two |
| Cermak T, et al [18].      | 68  | No                                                                                                                                                     | Golden-gate ligation                                                           | Golden-gate ligation<br>CMV promoter for mammalian cells.                                                                                                                            | Variable  | two |
| Schmid-Burgk J, et al [38] | 67  | No                                                                                                                                                     | Ligation-independent.<br>Multiple steps of plasmid digestion and purification. | Ligation<br>CMV promoter for mammalian cells.                                                                                                                                        | 19.5      | two |
| Kim Y, et al [36].         | 424 | No                                                                                                                                                     | Golden-gate ligation<br>CMV promoter for mammalian cells.                      |                                                                                                                                                                                      | 14.5-18.5 | one |
| Reyon D, et al [16].       | 376 | Yes. Plus multiple steps of plasmids digestion, purification and ligation.<br>Appropriate for large scale TALEN assembly through automation platform . |                                                                                | Ligation<br>CMV promoter for mammalian cells.                                                                                                                                        | Variable  | one |
